## Correction: 4-Hydroxyestradiol induces mammary epithelial cell transformation through Nrf2-mediated heme oxygenase-1 overexpression

Sin-Aye Park<sup>1</sup>, Mee-Hyun Lee<sup>1</sup>, Hye-Kyung Na<sup>4</sup> and Young-Joon Surh<sup>1,2,3</sup>

<sup>1</sup> Research Institute of Pharmaceutical Sciences, Seoul National University, Seoul 08826, South Korea

<sup>2</sup> Department of Molecular Medicine and Biopharmaceutical Sciences, Graduate School of Convergence Science and Technology, Seoul National University, Seoul 08826, South Korea

<sup>3</sup> Cancer Research Institute, Seoul National University, Seoul 110-799, South Korea

<sup>4</sup> Department of Food and Nutrition, College of Human Ecology, Sungshin Women's University, Seoul 136-742, South Korea

Published: February 08, 2019

**Copyright:** Park et al. This is an open-access article distributed under the terms of the Creative Commons Attribution License 3.0 (CC BY 3.0), which permits unrestricted use, distribution, and reproduction in any medium, provided the original author and source are credited.

**This article has been corrected:** During the assembly of Figure 2F, the same image was inadvertently used for both the mock and nonspecific RNA control (shNC) in vehicle (DMSO) treated groups. The proper Figure 2 is shown below. The authors declare that these corrections do not change the results or conclusions of this paper.

Original article: Oncotarget. 2017; 8:164-178. <https://doi.org/10.18632/oncotarget.10516>

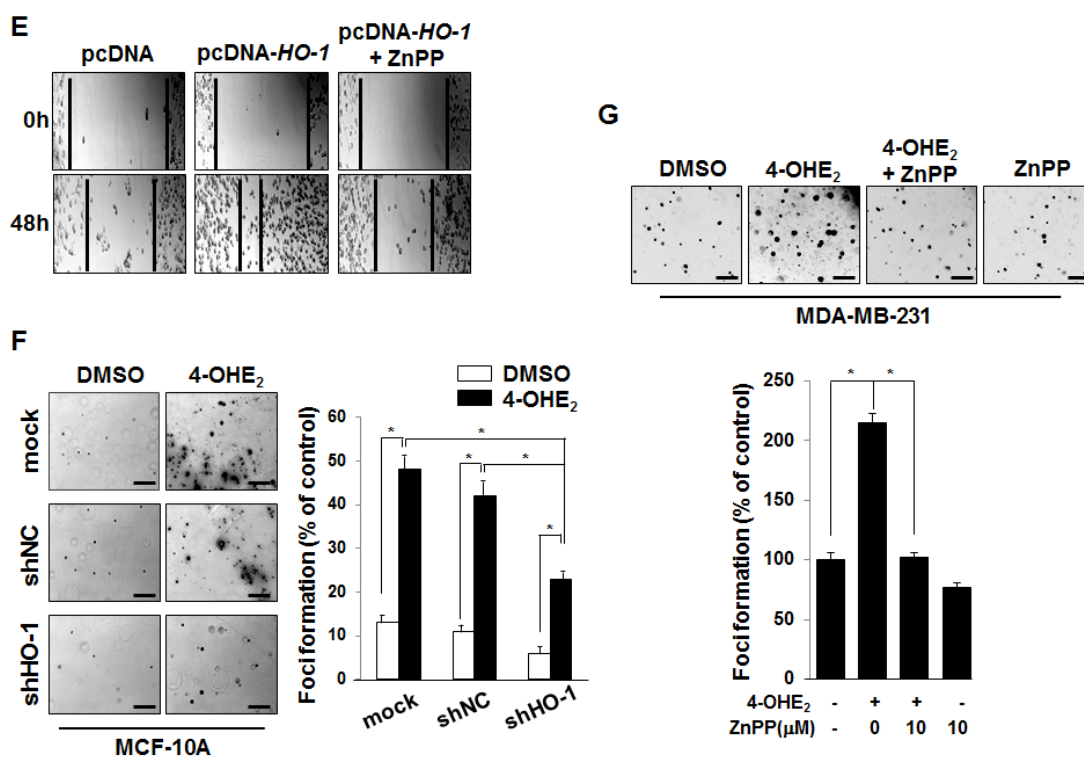

**Figure 2: 4-OHE<sub>2</sub>-induced HO-1 expression is associated with cell proliferation.** (E) The representative images of migration assay are from MDA-MB-231 cells transfected with control vector (pcDNA) or HO-1 plasmid in the absence or presence of ZnPP (10 μM) for 12 h. F-G, The anchorage-independent cell transformation assay was performed in MCF-10A or MDA-MB-231 cells as described in Material and Methods. Colonies were counted by using an inverted microscope (Nikon Diaphot 300). (F) MCF-10A-mock, MCF-10A-shNC, or MCF-10A-shHO-1 cells were treated with DMSO or 4-OHE<sub>2</sub> (20 μM) once every 3 days for 3 weeks. Scale bars: 200 μm. *n* = 4; \**P* < 0.001. (G) MDA-MB-231 cells were treated with DMSO, 4-OHE<sub>2</sub> (20 μM), or ZnPP (10 μM), separately or in combination. Scale bars: 200 μm. *n* = 4; \**P* < 0.001.
